# Supplementary material for: Activation and Regulation of Pancreatic Stellate Cells in Chronic Pancreatic Fibrosis: A Potential Therapeutic Approach for Chronic Pancreatitis
Source: MDPI journal article supplement (doi:10.3390/biomedicines12010108), 2024-01-04
Supplement: s1 [file s1]

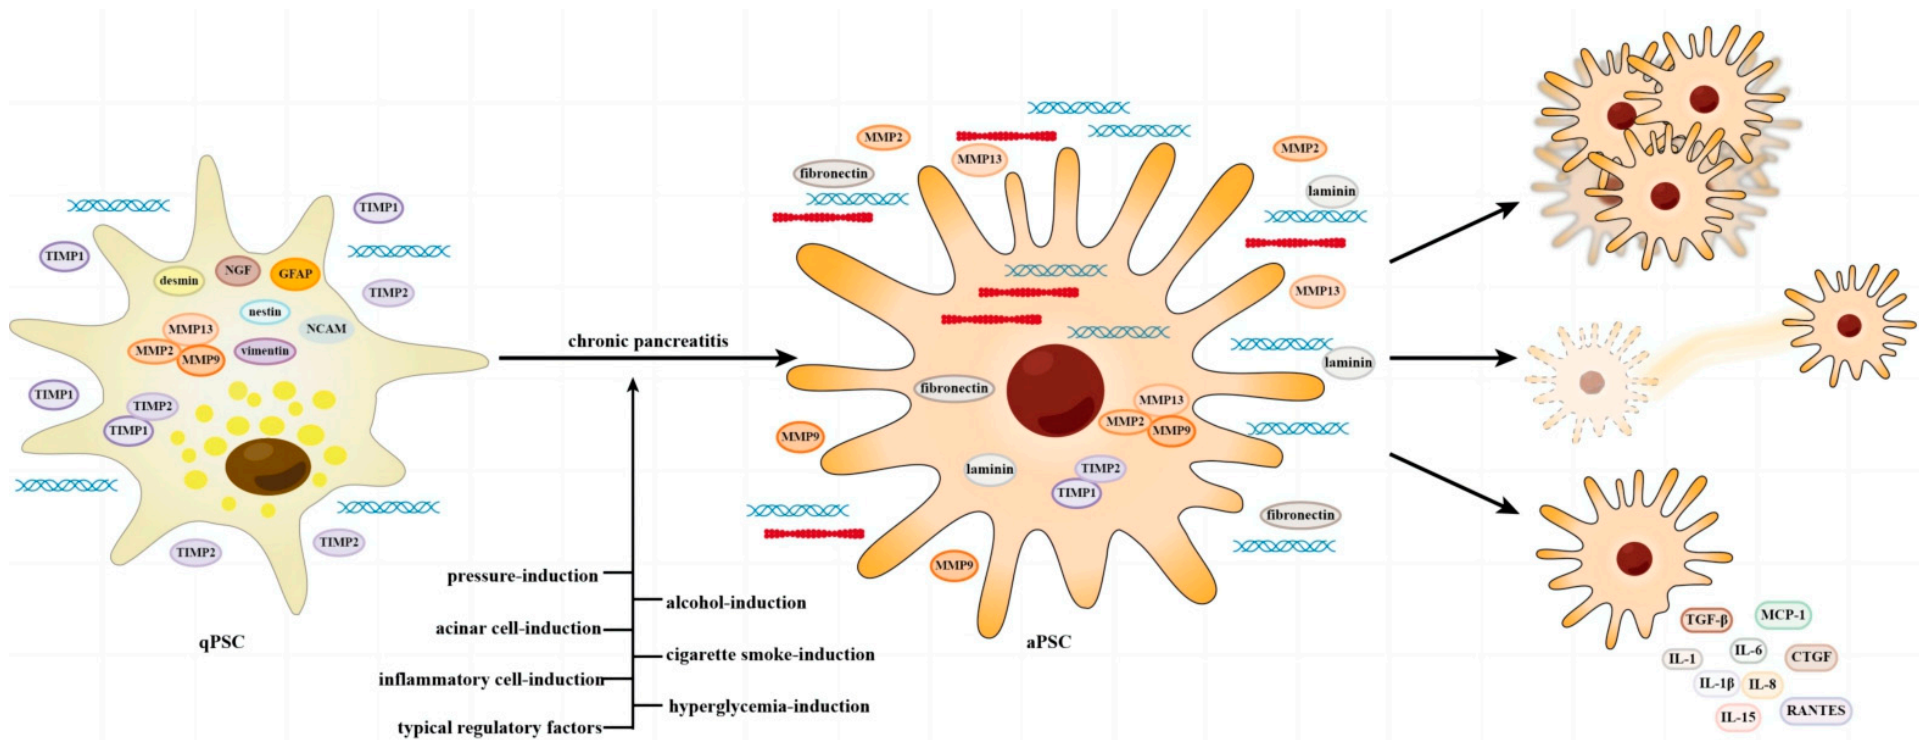

**Figure S1.** This figure illustrates the molecular and cellular characteristics of pancreatic stellate cells before and after activation.
